# Supplementary material
Source: PubMed Central journal article supplement (PMC3223361)
Supplement: supp_btr548_Supplementary_Methods_v1_0_20110928_1.pdf [file supp_btr548_Supplementary_Methods_v1_0_20110928_1.pdf]

---

# ProfileChaser: searching microarray repositories based on genome-wide patterns of differential expression

Jesse M Engreitz<sup>1,2</sup>, Rong Chen<sup>1,3</sup>, Alexander A Morgan<sup>1,3,4</sup>, Joel T Dudley<sup>1,3,4</sup>, Rohan Mal-  
lelwar<sup>5</sup>, and Atul J Butte<sup>1,3,\*</sup>

<sup>1</sup>Division of Systems Medicine, Department of Pediatrics, <sup>2</sup>Department of Bioengineering, <sup>3</sup>Lucile Packard Children's Hospital, and <sup>4</sup>Biomedical Informatics Training Program, Stanford University School of Medicine, Stanford, CA, USA, <sup>5</sup>Optra Systems Pvt. Ltd, 1, Dnyanesh, CTS No. 1179/3, Modern College Road, Shivajinagar, Pune, 411 005, India

---

## SUPPLEMENTARY METHODS

ProfileChaser indexes and searches GEO DataSets using a combination of previously developed techniques for dimension reduction, data representation, and similarity measure (Engreitz et al. 2010a, Engreitz et al. 2010b). The following section describes our analytical pipeline for processing microarray experiments from GEO.

*Data processing.* For GEO DataSets, we matched probe identifiers to NCBI identifiers using AILUN (Chen et al. 2007). For species other than *H. sapiens*, we mapped genes to their unique human homologs with Homologene, discarding genes with multiple matches. To normalize expression values across datasets and platforms, we examined GEO annotations and value ranges for each dataset, and converted to log space as needed. We aggregated probes to genes using the fixed-effects meta-estimate, weighting the contribution of each probe by its variance.

*Dimension reduction.* Previously we applied independent component analysis to a compendium of 10,000 microarrays to identify *fundamental components* of human gene expression (Engreitz et al. 2010a). These 423 fundamental components represented coherent, functionally-relevant transcriptional programs that together spanned the space of human gene expression sampled in our compendium. To improve the speed and robustness of ProfileChaser, we projected each GEO microarray into this reduced feature-space using:

$$A = S^T X,$$

where  $A$  is the reduced representation of the microarray experiment (423 features  $\times$  thousands of profiles),  $S$  is the component matrix (thousands of genes  $\times$  423 features), and  $X$  is the original data in gene-space (thousands of genes  $\times$  thousands of profiles). We found that this method, resulting in an approximately 50-fold reduction in the dimensionality of the data, yielded superior performance for comparing differential expression profiles, even across species and platforms (Engreitz et al. 2010b).

*Data representation.* ProfileChaser aims to index differential expression comparisons in GEO. To generate these profiles, we used the manually curated experimental variables defined in GEO DataSets to compare sets of microarrays. For each comparison, we created a *differential expression (DE) profile* by calculating the fold-change for each of the 423 fundamental components or features. In addition to fold-change, we calculated the probability that each fundamental component was differentially expressed using the empirical Bayes moderated  $t$ -statistic, implemented in the *limma* R package (Smyth 2004).  $P$ -values were corrected for multiple hypothesis testing using the Benjamini-Hochberg method.

*Similarity measure.* To compare DE profiles (vectors containing 423 elements), we use a weighted Pearson's correlation coefficient that considers the correct empirical Bayes  $p$ -value. Weights for the correlation are calculated by

$$w_i = \left[ -\log(p_{i1}p_{i2}) \right]^{1/2},$$

where  $p_{ij}$  is the corrected  $p$ -value for feature  $i$  in experiment  $j$ . Intuitively, features that are consistently differentially expressed in both DE profiles are given higher weights. When querying ProfileChaser, we calculate false discovery rate (FDR) for each retrieved result based on a null distribution of correlation coefficients between all 14,875 experimental comparisons. This FDR is likely an underestimate, since many of these experiments are in fact related to one another.

*Identifying significant genes.* To aid in identifying individual genes that contribute to this comparison, we also created DE profiles in gene-space for all GEO DataSet comparisons. We create scatterplots to show the global similarities and differences in expression between two DE profiles. The axes of these scatterplots represent the  $\log_2$  difference in expression between two conditions. The size of the point for gene  $i$  is directly proportional to the gene's contribution to the weighted correlation coefficient:

$$Area \propto w_i(x_{i1} - m_1)(x_{i2} - m_2),$$

where  $x_{ij}$  is the differential expression of gene  $i$  in profile  $j$  and  $m_j$  is the weighted mean of genes in profile  $j$ . Thus the largest points in the scatterplot represent genes that add positive contributions to the correlation coefficient (*i.e.*, genes that are differentially expressed in the same direction in both DE profiles).

## REFERENCES

- Chen,R. et al. (2007) AILUN: reannotating gene expression data automatically. *BMC Nat Methods*, **4**(11), 548.
- Engreitz,J.M. et al. (2010a) Independent component analysis: Mining microarray data for fundamental human gene modules. *J Biomed Inform*, **43**, 932-944.
- Engreitz,J.M. et al. (2010b) Content-based microarray search using differential expression profiles. *BMC Bioinformatics*, **11**(1), 603.
- Smyth, G.K. (2004) Linear models and empirical bayes methods for assessing differential expression in microarray experiments. *Stat Appl Genet Mol Biol*, **3**:Article 3.

## SUPPLEMENTARY FIGURES

| Rank | GEO                     | Title                                                                                            | Organism            | Subset 1 vs. Subset 2                                          | Factor          | Score  | q-value |
|------|-------------------------|--------------------------------------------------------------------------------------------------|---------------------|----------------------------------------------------------------|-----------------|--------|---------|
| 1    | <a href="#">GDS2324</a> | Low concentrations of 17beta-estradiol effect on breast cancer cell line                         | <i>Homo sapiens</i> | 0 pM vs. 100 pM                                                | dose            | 0.8995 | 0.0007  |
| 2    | <a href="#">GDS3285</a> | Estrogen effect on breast cancer cell line: time course                                          | <i>Homo sapiens</i> | 6 h vs. 12 h                                                   | time            | 0.8778 | 0.0008  |
| 3    | <a href="#">GDS1821</a> | Muscle cell survival mediated by transcriptional coactivator p300                                | <i>Mus musculus</i> | 24 h vs. 0 h                                                   | time            | 0.8429 | 0.0009  |
| 4    | <a href="#">GDS2323</a> | Estrogen-starved breast cancer cell line: time course                                            | <i>Homo sapiens</i> | 2 d vs. 0 d                                                    | time            | 0.8670 | 0.0009  |
| 5    | <a href="#">GDS2324</a> | Low concentrations of 17beta-estradiol effect on breast cancer cell line                         | <i>Homo sapiens</i> | 0 pM vs. 30 pM                                                 | dose            | 0.8634 | 0.0009  |
| 6    | <a href="#">GDS2324</a> | Low concentrations of 17beta-estradiol effect on breast cancer cell line                         | <i>Homo sapiens</i> | 0 pM vs. 60 pM                                                 | dose            | 0.8687 | 0.0009  |
| 7    | <a href="#">GDS3222</a> | Cytotoxic T cell line response to interleukin-2: time course                                     | <i>Mus musculus</i> | 4 h vs. 16 h                                                   | time            | 0.8434 | 0.0009  |
| 8    | <a href="#">GDS1409</a> | cAMP/protein kinaseA effect on cell-cycle regulation: timecourse                                 | <i>Mus musculus</i> | 24 h vs. 6 h                                                   | time            | 0.8267 | 0.0010  |
| 9    | <a href="#">GDS2324</a> | Low concentrations of 17beta-estradiol effect on breast cancer cell line                         | <i>Homo sapiens</i> | 10 pM vs. 100 pM                                               | dose            | 0.8352 | 0.0010  |
| 10   | <a href="#">GDS2562</a> | Prostate response to castration and subsequent hormone replacement                               | <i>Mus musculus</i> | 3 days castrated vs. 14 days castrated, 3 days on testosterone | protocol        | 0.8341 | 0.0010  |
| 11   | <a href="#">GDS2854</a> | Myogenic transcription factor MyoD mutant expression effect on embryonic fibroblast: time course | <i>Mus musculus</i> | 24 h vs. 12 h                                                  | time            | 0.8371 | 0.0010  |
| 12   | <a href="#">GDS3222</a> | Cytotoxic T cell line response to interleukin-2: time course                                     | <i>Mus musculus</i> | 1 h vs. 24 h                                                   | time            | 0.8354 | 0.0010  |
| 13   | <a href="#">GDS3222</a> | Cytotoxic T cell line response to interleukin-2: time course                                     | <i>Mus musculus</i> | 2 h vs. 16 h                                                   | time            | 0.8303 | 0.0010  |
| 14   | <a href="#">GDS3222</a> | Cytotoxic T cell line response to interleukin-2: time course                                     | <i>Mus musculus</i> | 2 h vs. 24 h                                                   | time            | 0.8356 | 0.0010  |
| 15   | <a href="#">GDS3222</a> | Cytotoxic T cell line response to interleukin-2: time course                                     | <i>Mus musculus</i> | 4 h vs. 10 h                                                   | time            | 0.8259 | 0.0010  |
| 16   | <a href="#">GDS3222</a> | Cytotoxic T cell line response to interleukin-2: time course                                     | <i>Mus musculus</i> | 4 h vs. 12 h                                                   | time            | 0.8308 | 0.0010  |
| 17   | <a href="#">GDS2323</a> | Estrogen-starved breast cancer cell line: time course                                            | <i>Homo sapiens</i> | 1 d vs. 0 d                                                    | time            | 0.8013 | 0.0011  |
| 18   | <a href="#">GDS2367</a> | Tamoxifen effect on breast cancer cell line expressing estrogen receptor alpha and beta          | <i>Homo sapiens</i> | vehicle vs. tamoxifen                                          | agent           | 0.8021 | 0.0011  |
| 19   | <a href="#">GDS3222</a> | Cytotoxic T cell line response to interleukin-2: time course                                     | <i>Mus musculus</i> | 0 h vs. 24 h                                                   | time            | 0.8092 | 0.0011  |
| 20   | <a href="#">GDS3222</a> | Cytotoxic T cell line response to interleukin-2: time course                                     | <i>Mus musculus</i> | 8 h vs. 24 h                                                   | time            | 0.8011 | 0.0011  |
| 21   | <a href="#">GDS3222</a> | Cytotoxic T cell line response to interleukin-2: time course                                     | <i>Mus musculus</i> | 1 h vs. 16 h                                                   | time            | 0.8061 | 0.0011  |
| 22   | <a href="#">GDS3482</a> | X-linked inhibitor of apoptosis XIAP depletion effect on a colorectal cancer cell line           | <i>Homo sapiens</i> | early passage vs. late passage                                 | other           | 0.8178 | 0.0011  |
| 23   | <a href="#">GDS568</a>  | Erythroid differentiation: G1E model                                                             | <i>Mus musculus</i> | 30 h post-estradiol vs. 14 h post-estradiol                    | time            | 0.8182 | 0.0011  |
| 24   | <a href="#">GDS911</a>  | Growth-arrested cell: serum deprivation and contact inhibition growth-arrest comparison          | <i>Homo sapiens</i> | serum deprivation vs. asynchronous                             | growth protocol | 0.8163 | 0.0011  |
| 25   | <a href="#">GDS1549</a> | Estrogen effect on estrogen receptor alpha positive breast cancer cell lines                     | <i>Homo sapiens</i> | control vs. estradiol                                          | agent           | 0.7843 | 0.0012  |
| 26   | <a href="#">GDS1873</a> | Antiestrogen and aromatase inhibitor effect on breast cancer cells                               | <i>Homo sapiens</i> | control vs. hormone treatment                                  | other           | 0.7764 | 0.0012  |
| 27   | <a href="#">GDS2024</a> | Lung immune response to <i>Nippostrongylus brasiliensis</i> infection: time course               | <i>Mus musculus</i> | 8 dpi vs. 3 dpi                                                | time            | 0.7808 | 0.0012  |
| 28   | <a href="#">GDS2324</a> | Low concentrations of 17beta-estradiol effect on breast cancer cell line                         | <i>Homo sapiens</i> | 30 pM vs. 100 pM                                               | dose            | 0.7815 | 0.0012  |
| 29   | <a href="#">GDS2367</a> | Tamoxifen effect on breast cancer cell line expressing estrogen receptor alpha and beta          | <i>Homo sapiens</i> | vehicle vs. estradiol                                          | agent           | 0.7967 | 0.0012  |
| 30   | <a href="#">GDS2965</a> | Embryonic heart response to retinoic acid and dioxin: time course                                | <i>Danio rerio</i>  | TCDD vs. control for TCDD                                      | agent           | 0.7725 | 0.0012  |

Supplementary Figure S1. Top thirty search results for GDS3315 (control vs. estradiol).

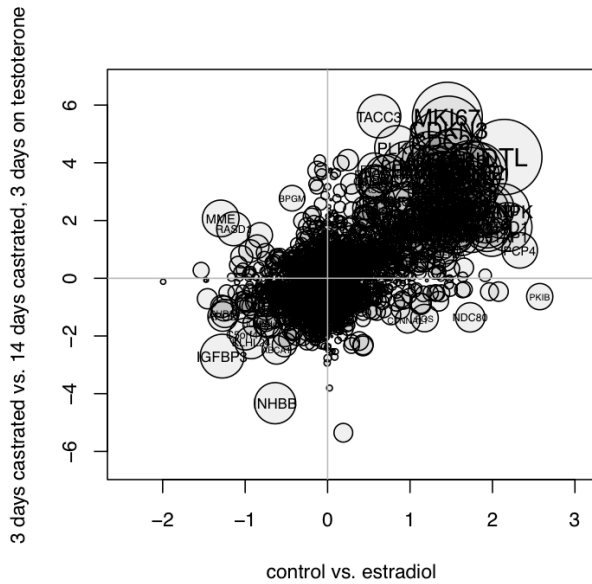

| Symbol | Description                                       | Profile 1   |         | Profile 2   |         | Weight | Contribution |
|--------|---------------------------------------------------|-------------|---------|-------------|---------|--------|--------------|
|        |                                                   | Fold-change | P-value | Fold-change | P-value |        |              |
| DTL    | denticleless homolog (Drosophila)                 | 2.1434      | 0.0000  | 4.2003      | 0.0000  | 2.5928 | 0.008518     |
| MKI67  | antigen identified by monoclonal antibody Ki-67   | 1.4525      | 0.0000  | 5.5799      | 0.0000  | 2.5252 | 0.007354     |
| CDKN3  | cyclin-dependent kinase inhibitor 3               | 1.4690      | 0.0000  | 5.1452      | 0.0000  | 2.4949 | 0.006787     |
| TCF19  | transcription factor 19                           | 1.5498      | 0.0000  | 4.0422      | 0.0000  | 2.7139 | 0.006158     |
| NCAPH  | non-SMC condensin I complex                       | 1.5243      | 0.0000  | 4.0983      | 0.0000  | 2.6024 | 0.005884     |
| CDC2   | cell division cycle 2                             | 1.3751      | 0.0000  | 4.7299      | 0.0000  | 2.4992 | 0.005847     |
| UHRF1  | ubiquitin-like with PHD and ring finger domains 1 | 1.8028      | 0.0000  | 3.6458      | 0.0001  | 2.4209 | 0.005801     |
| POLE2  | polymerase (DNA directed)                         | 1.7328      | 0.0000  | 3.6927      | 0.0000  | 2.4792 | 0.005776     |
| ANLN   | anillin                                           | 1.7215      | 0.0000  | 3.4996      | 0.0000  | 2.4587 | 0.005400     |
| TTK    | TTK protein kinase                                | 1.6758      | 0.0000  | 3.6596      | 0.0001  | 2.2192 | 0.004952     |

**Supplementary Figure S2.** Comparison of differential expression profiles from GDS3315 (Profile 1: control vs. estradiol) and GDS2562 (Profile 2: 3 days castrated vs. 14 days castrated, 3 days on testosterone). Scatterplot displays the  $\log_2$  fold-change for genes in each comparison. The area of each point is proportional to each gene's contribution to the final correlation coefficient (see Supplementary Methods). Top genes include many proliferation markers, including MKI67, the locus that codes for Ki-67.

$\beta$

| Rank | GEO                     | Title                                                                                            | Organism            | Subset 1 vs. Subset 2                                    | Factor        | Score  | q-value |
|------|-------------------------|--------------------------------------------------------------------------------------------------|---------------------|----------------------------------------------------------|---------------|--------|---------|
| 1    | <a href="#">GDS2617</a> | Tumorigenic breast cancer cells (HG-U133A)                                                       | <i>Homo sapiens</i> | non-tumorigenic cancer cell vs. tumorigenic cancer cell  | disease state | 0.7438 | 0.0015  |
| 2    | <a href="#">GDS3017</a> | Cervical cancer response to chemoradiotherapy                                                    | <i>Homo sapiens</i> | patient 1676 vs. patient 2030                            | individual    | 0.5435 | 0.0095  |
| 3    | <a href="#">GDS1329</a> | Molecular apocrine breast tumors                                                                 | <i>Homo sapiens</i> | luminal tumor vs. basal tumor                            | disease state | 0.5418 | 0.0096  |
| 4    | <a href="#">GDS1925</a> | Estrogen receptor alpha positive breast cancer cells response to hyperactivation of MAPK pathway | <i>Homo sapiens</i> | long-term E2 independent growth vs. EGFR                 | cell line     | 0.5312 | 0.0102  |
| 5    | <a href="#">GDS1925</a> | Estrogen receptor alpha positive breast cancer cells response to hyperactivation of MAPK pathway | <i>Homo sapiens</i> | long-term E2 independent growth vs. Raf-1                | cell line     | 0.5299 | 0.0103  |
| 6    | <a href="#">GDS2250</a> | Basal-like breast cancer tumors                                                                  | <i>Homo sapiens</i> | non-basal-like cancer vs. basal-like cancer              | disease state | 0.5107 | 0.0120  |
| 7    | <a href="#">GDS3017</a> | Cervical cancer response to chemoradiotherapy                                                    | <i>Homo sapiens</i> | patient 1676 vs. patient 1243                            | individual    | 0.5068 | 0.0126  |
| 8    | <a href="#">GDS3017</a> | Cervical cancer response to chemoradiotherapy                                                    | <i>Homo sapiens</i> | patient 1688 vs. patient 2030                            | individual    | 0.5019 | 0.0128  |
| 9    | <a href="#">GDS3017</a> | Cervical cancer response to chemoradiotherapy                                                    | <i>Homo sapiens</i> | patient 1676 vs. patient 2512                            | individual    | 0.4912 | 0.0146  |
| 10   | <a href="#">GDS3017</a> | Cervical cancer response to chemoradiotherapy                                                    | <i>Homo sapiens</i> | patient 1676 vs. patient 1677                            | individual    | 0.4821 | 0.0159  |
| 11   | <a href="#">GDS2516</a> | Interferons effect on endothelial cells                                                          | <i>Homo sapiens</i> | control vs. interferon alpha                             | agent         | 0.4743 | 0.0163  |
| 12   | <a href="#">GDS3017</a> | Cervical cancer response to chemoradiotherapy                                                    | <i>Homo sapiens</i> | patient 1676 vs. patient 1353                            | individual    | 0.4773 | 0.0163  |
| 13   | <a href="#">GDS3017</a> | Cervical cancer response to chemoradiotherapy                                                    | <i>Homo sapiens</i> | patient 1676 vs. patient 1687                            | individual    | 0.4732 | 0.0166  |
| 14   | <a href="#">GDS3017</a> | Cervical cancer response to chemoradiotherapy                                                    | <i>Homo sapiens</i> | patient 1676 vs. patient 783                             | individual    | 0.4723 | 0.0167  |
| 15   | <a href="#">GDS1329</a> | Molecular apocrine breast tumors                                                                 | <i>Homo sapiens</i> | apocrine tumor vs. basal tumor                           | disease state | 0.4710 | 0.0169  |
| 16   | <a href="#">GDS3017</a> | Cervical cancer response to chemoradiotherapy                                                    | <i>Homo sapiens</i> | patient 1676 vs. patient 275                             | individual    | 0.4660 | 0.0176  |
| 17   | <a href="#">GDS3017</a> | Cervical cancer response to chemoradiotherapy                                                    | <i>Homo sapiens</i> | patient 1676 vs. patient 1993                            | individual    | 0.4580 | 0.0186  |
| 18   | <a href="#">GDS3017</a> | Cervical cancer response to chemoradiotherapy                                                    | <i>Homo sapiens</i> | patient 1688 vs. patient 1687                            | individual    | 0.4590 | 0.0186  |
| 19   | <a href="#">GDS3210</a> | Airway epithelial cells response to Sendai virus infection in vitro                              | <i>Mus musculus</i> | control vs. Sendai virus                                 | infection     | 0.4590 | 0.0186  |
| 20   | <a href="#">GDS2958</a> | Tumor suppressor PTEN depletion effect on various cell lines                                     | <i>Homo sapiens</i> | SKBR-3 vs. HCC827                                        | cell line     | 0.4566 | 0.0190  |
| 21   | <a href="#">GDS2958</a> | Tumor suppressor PTEN depletion effect on various cell lines                                     | <i>Homo sapiens</i> | mammary adenocarcinoma vs. non-small cell lung carcinoma | cell type     | 0.4566 | 0.0190  |
| 22   | <a href="#">GDS3017</a> | Cervical cancer response to chemoradiotherapy                                                    | <i>Homo sapiens</i> | patient 1688 vs. patient 1353                            | individual    | 0.4569 | 0.0190  |
| 23   | <a href="#">GDS2341</a> | Type I and Type II interferons effect on lung epithelial cell line: time course                  | <i>Homo sapiens</i> | untreated vs. Type I IFN                                 | agent         | 0.4548 | 0.0196  |
| 24   | <a href="#">GDS3017</a> | Cervical cancer response to chemoradiotherapy                                                    | <i>Homo sapiens</i> | patient 1676 vs. patient 2791                            | individual    | 0.4515 | 0.0203  |
| 25   | <a href="#">GDS3017</a> | Cervical cancer response to chemoradiotherapy                                                    | <i>Homo sapiens</i> | patient 1676 vs. patient 1988                            | individual    | 0.4477 | 0.0210  |
| 26   | <a href="#">GDS1381</a> | Carboplatin sensitive and resistant ovarian carcinoma                                            | <i>Homo sapiens</i> | patient 5 vs. patient 2                                  | individual    | 0.4473 | 0.0211  |
| 27   | <a href="#">GDS1381</a> | Carboplatin sensitive and resistant ovarian carcinoma                                            | <i>Homo sapiens</i> | patient 6 vs. patient 2                                  | individual    | 0.4458 | 0.0214  |
| 28   | <a href="#">GDS2414</a> | Decidual stromal cell response to trophoblast conditioned medium: time course                    | <i>Homo sapiens</i> | control vs. trophoblast conditioned medium               | agent         | 0.4441 | 0.0215  |
| 29   | <a href="#">GDS3155</a> | Dasatinib resistant and sensitive prostatic cancer cell lines                                    | <i>Homo sapiens</i> | dasatinib resistant vs. dasatinib sensitive              | other         | 0.4442 | 0.0215  |
| 30   | <a href="#">GDS3017</a> | Cervical cancer response to chemoradiotherapy                                                    | <i>Homo sapiens</i> | patient 1676 vs. patient 1690                            | individual    | 0.4439 | 0.0216  |

**Supplementary Figure S3.** Top thirty search results for GDS2618 (tumorigenic cancer cells vs. non-tumorigenic cancer cells). GDS2617, which represents the same samples run on a companion platform (HG-U133B), is identified as the top hit, despite the fact that HG-U133A and HG-U133B measure only 4431 of the same genes (out of 13,780 and 10,044 genes, respectively). This search identifies dasatinib as a potential inhibitor of breast cancer stem cells (see Result 29).

| Sample Subsets |         |               |                      |                                                |
|----------------|---------|---------------|----------------------|------------------------------------------------|
| Samples        | Factors |               |                      | Title                                          |
|                | time    | agent         | growth protocol      |                                                |
| GSM25978       | 0 h     | control       | no selection         | A404 SMC Differentiation Control Replicate 1   |
| GSM25979       | 0 h     | control       | no selection         | A404 SMC Differentiation Control Replicate 2   |
| GSM26006       | 0 h     | control       | no selection         | A404 SMC Differentiation Control Replicate 3   |
| GSM26007       | 0 h     | control       | no selection         | A404 SMC Differentiation Control Replicate 4   |
| GSM26008       | 0 h     | control       | no selection         | A404 SMC Differentiation Control Replicate 5   |
| GSM26009       | 0 h     | control       | no selection         | A404 SMC Differentiation Control Replicate 6   |
| GSM26010       | 48 h    | retinoic acid | no selection         | A404 SMC Differentiation RA48 Replicate 1      |
| GSM26011       | 48 h    | retinoic acid | no selection         | A404 SMC Differentiation RA48 Replicate 2      |
| GSM26012       | 48 h    | retinoic acid | no selection         | A404 SMC Differentiation RA48 Replicate 3      |
| GSM26013       | 48 h    | retinoic acid | no selection         | A404 SMC Differentiation RA48 Replicate 4      |
| GSM26014       | 48 h    | retinoic acid | no selection         | A404 SMC Differentiation RA48 Replicate 5      |
| GSM26015       | 96 h    | retinoic acid | no selection         | A404 SMC Differentiation RA96 Replicate 1      |
| GSM26016       | 96 h    | retinoic acid | no selection         | A404 SMC Differentiation RA96 Replicate 2      |
| GSM26017       | 96 h    | retinoic acid | no selection         | A404 SMC Differentiation RA96 Replicate 3      |
| GSM26018       | 96 h    | retinoic acid | no selection         | A404 SMC Differentiation RA96 Replicate 4      |
| GSM26019       | 96 h    | retinoic acid | no selection         | A404 SMC Differentiation RA96 Replicate 5      |
| GSM26020       | 96 h    | retinoic acid | no selection         | A404 SMC Differentiation RA96 Replicate 6      |
| GSM26021       | 96 h    | retinoic acid | puromycin resistance | A404 SMC Differentiation Puromycin Replicate 1 |
| GSM26022       | 96 h    | retinoic acid | puromycin resistance | A404 SMC Differentiation Puromycin Replicate 2 |
| GSM26023       | 96 h    | retinoic acid | puromycin resistance | A404 SMC Differentiation Puromycin Replicate 3 |
| GSM26024       | 96 h    | retinoic acid | puromycin resistance | A404 SMC Differentiation Puromycin Replicate 4 |
| GSM26025       | 96 h    | retinoic acid | puromycin resistance | A404 SMC Differentiation Puromycin Replicate 5 |
| GSM26026       | 96 h    | retinoic acid | puromycin resistance | A404 SMC Differentiation Puromycin Replicate 6 |

**Supplementary Figure S4.** Example of a GEO Dataset with a multifactorial experimental design (GDS799, <http://www.ncbi.nlm.nih.gov/sites/GDSbrowser?acc=GDS799>). ProfileChaser compares all arrays annotated in each subset; for example, we generate a differential expression profile for all arrays labeled with “no selection” compared to all arrays labeled with “puromycin resistance.” However, this comparison is partially confounded in that the “no selection” subset includes samples generated at multiple time points and with differing application of retinoic acid. The results page of the web server indicates the additional factors in each experimental design, but all results should be interpreted carefully through inspection of the experimental design defined by GEO and the original study references. For more information, see the tutorial on the ProfileChaser web site.
